# Supplementary material for: Subspecific differentiation in male reproductive traits and virgin queen preferences, in Bombus terrestris
Source: Springer Nature journal article supplement (doi:10.1007/s13592-015-0349-y), 2015-02-17
Supplement: MOESM3 [file 13592_2015_349_MOESM3_ESM.xlsx]

## Sheet: Feuil1
Table S3. GLM results.
Subspecific differentiation in male reproductive traits and virgin queen preferences, in Bombus terrestris Thomas Lecocq1*A, Audrey Coppée1A, Tiffany Mathy1, Patrick Lhomme2, Marie-Claire Cammaerts-Tricot3, Klara Urbanová4, Irena Valterová4 & Pierre Rasmont1 1 University of Mons, Research institute of Biosciences, Laboratory of Zoology, Place du Parc 20, 7000 Mons, Belgium 2 Sweden 3 Université L…

## Sheet: Feuil3
Pairwise comparisions		p-value (GLM, Poisson)
B. terrestris dalmatinus	B. terrestris dalmatinus	< 2.2 e-16
B. terrestris dalmatinus	B. terrestris xanthopus	< 2.2 e-16
B. terrestris dalmatinus	B. terrestris sassaricus	1.54 e-13
B. terrestris dalmatinus	B. terrestris canariensis	9.25 e-12
B. terrestris dalmatinus	B. ignitus	0.16
